# Supplementary material for: Systematic underestimation of type-specific ecosystem process variability in the Community Land Model v5 over Europe
Source: Copernicus journal article supplement (doi:10.5194/gmd-18-287-2025), 2025-01-21
Supplement: Supplementary file 1 [file gmd-18-287-2025-supplement.pdf]

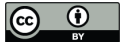

*Supplement of*

## **Systematic underestimation of type-specific ecosystem process variability in the Community Land Model v5 over Europe**

**Christian Poppe Terán et al.**

*Correspondence to:* Christian Poppe Terán (c.poppe@fz-juelich.de)

The copyright of individual parts of the supplement might differ from the article licence.

## Supplement

1160 **Table S1: A list of ICOS stations, their land cover, coordinates, years of data availability for our study period (1995 – 2018), the coordinates of the corresponding grid cell of the 3 km European Coordinated Regional Climate Downscaling Experiment (CORDEX) grid used in our simulations, and the number of 8-daily data points available for the analyses for evapotranspiration (ET) and gross primary production (GPP). Note that stations that do not belong to the plant functional types (PFT) of evergreen needleleaf forest (ENF), deciduous broadleaf forest (DBF), grasslands (GRA), and croplands (CRO) were omitted, and some**  
 1165 **included sites did not have data corresponding with the study period, thus having a count of 0 data points. See Section 2.2.1. The indicated PFT is the predominant PFT in the footprint of the ICOS eddy covariance towers. Stations, where the land cover was not directly indicated in the metadata sites were also left out in our analyses.**

| <b>ID</b>     | <b>country</b> | <b>PFT</b> | <b>lat</b> | <b>lon</b> | <b>years</b>   | <b>lat<br/>(cell)</b> | <b>lon<br/>(cell)</b> | <b>N (ET)</b> | <b>N<br/>(GPP)</b> |
|---------------|----------------|------------|------------|------------|----------------|-----------------------|-----------------------|---------------|--------------------|
| <b>BE-Bra</b> | Belgium        | ENF        | 51.3<br>1  | 4.52       | 1996 –<br>2018 | 51.29                 | 4.51                  | 608           | 670                |
| <b>BE-Dor</b> | Belgium        | GR<br>A    | 50.3<br>1  | 4.97       | 2011 –<br>2018 | 50.31                 | 4.96                  | 0             | 270                |
| <b>BE-Lcr</b> | Belgium        | DBF        | 51.1<br>1  | 3.85       |                | 51.10                 | 3.85                  | 0             | 0                  |
| <b>BE-Lon</b> | Belgium        | CR<br>O    | 50.5<br>5  | 4.75       | 2004 –<br>2018 | 50.57                 | 4.76                  | 519           | 476                |
| <b>CH-Cha</b> | Switzerland    | GR<br>A    | 47.2<br>1  | 8.41       | 2005 –<br>2018 | 47.21                 | 8.43                  | 423           | 459                |
| <b>CH-Dav</b> | Switzerland    | ENF        | 46.8<br>2  | 9.86       | 1997 –<br>2018 | 46.80                 | 9.84                  | 578           | 866                |
| <b>CH-Fru</b> | Switzerland    | GR<br>A    | 47.1<br>2  | 8.54       | 2005 –<br>2018 | 47.11                 | 8.53                  | 284           | 447                |
| <b>CH-Oe2</b> | Switzerland    | CR<br>O    | 47.2<br>9  | 7.73       | 2004 –<br>2018 | 47.28                 | 7.72                  | 0             | 592                |

|               |                |         |       |       |             |       |       |      |     |
|---------------|----------------|---------|-------|-------|-------------|-------|-------|------|-----|
| <b>CZ-BK1</b> | Czech Republic | ENF     | 49.50 | 18.54 | 2004 – 2018 | 49.50 | 18.54 | 146  | 389 |
| <b>CZ-Lnz</b> | Czech Republic | DBF     | 48.68 | 16.95 | 2015 – 2018 | 48.67 | 16.95 | 0    | 145 |
| <b>DE-Geb</b> | Germany        | CR<br>O | 51.10 | 10.91 | 2001 – 2020 | 51.10 | 10.93 | 824  | 638 |
| <b>DE-Gri</b> | Germany        | GR<br>A | 50.95 | 13.51 | 2001 – 2018 | 50.95 | 13.49 | 673  | 492 |
| <b>DE-Hai</b> | Germany        | DBF     | 51.08 | 10.45 | 2000 – 2018 | 51.07 | 10.45 | 813  | 548 |
| <b>DE-HoH</b> | Germany        | DBF     | 52.09 | 11.22 | 2015 – 2018 | 52.09 | 11.23 | 184  | 113 |
| <b>DE-Kli</b> | Germany        | CR<br>O | 50.89 | 13.52 | 2004 – 2018 | 50.90 | 13.54 | 481  | 450 |
| <b>DE-RuR</b> | Germany        | GR<br>A | 50.62 | 6.30  | 2011 – 2018 | 50.62 | 6.28  | 336  | 309 |
| <b>DE-RuS</b> | Germany        | CR<br>O | 50.87 | 6.45  | 2011 – 2018 | 50.86 | 6.44  | 285  | 224 |
| <b>DE-RuW</b> | Germany        | ENF     | 50.50 | 6.33  | 2012 – 2018 | 50.51 | 6.31  | 0    | 125 |
| <b>DE-Tha</b> | Germany        | ENF     | 50.96 | 13.57 | 1996 – 2018 | 50.96 | 13.58 | 1012 | 888 |
| <b>DK-Gds</b> | Denmark        | ENF     | 56.07 | 9.33  |             | 56.07 | 9.34  | 0    | 0   |
| <b>DK-Sor</b> | Denmark        | DBF     | 55.49 | 11.64 | 1996 – 2018 | 55.48 | 11.65 | 437  | 882 |

|               |         |         |           |           |                |       |       |     |     |
|---------------|---------|---------|-----------|-----------|----------------|-------|-------|-----|-----|
| <b>FI-Hyy</b> | Finland | ENF     | 61.8<br>5 | 24.2<br>9 | 1996 –<br>2018 | 61.86 | 24.29 | 435 | 812 |
| <b>FI-Ken</b> | Finland | ENF     | 67.9<br>9 | 24.2<br>4 | 2018           | 67.99 | 24.23 | 0   | 18  |
| <b>FI-Let</b> | Finland | ENF     | 60.6<br>4 | 23.9<br>6 | 2009 –<br>2018 | 60.63 | 23.96 | 412 | 254 |
| <b>FI-Var</b> | Finland | ENF     | 67.7<br>5 | 29.6<br>1 | 2016 –<br>2018 | 67.76 | 29.63 | 135 | 133 |
| <b>FR-Aur</b> | France  | CR<br>O | 43.5<br>5 | 1.11      | 2005 –<br>2018 | 43.54 | 1.12  | 470 | 483 |
| <b>FR-Bil</b> | France  | ENF     | 44.4<br>9 | -0.96     | 2014 –<br>2020 | 44.50 | -0.98 | 203 | 144 |
| <b>FR-FBn</b> | France  | ENF     | 43.2<br>4 | 5.68      | 2008 –<br>2018 | 43.25 | 5.69  | 0   | 358 |
| <b>FR-Fon</b> | France  | DBF     | 48.4<br>8 | 2.78      | 2005 –<br>2018 | 48.47 | 2.80  | 0   | 566 |
| <b>FR-Gri</b> | France  | CR<br>O | 48.8<br>4 | 1.95      | 2004 –<br>2018 | 48.86 | 1.95  | 563 | 313 |
| <b>FR-Hes</b> | France  | DBF     | 48.6<br>7 | 7.06      | 2014 –<br>2018 | 48.67 | 7.05  | 229 | 219 |
| <b>FR-Lam</b> | France  | CR<br>O | 43.5<br>0 | 1.24      | 2005 –<br>2018 | 43.51 | 1.25  | 548 | 431 |
| <b>FR-Tou</b> | France  | GR<br>A | 43.5<br>7 | 1.37      | 2018           | 43.58 | 1.38  | 46  | 28  |
| <b>IT-BFt</b> | Italy   | DBF     | 45.2<br>0 | 10.7<br>4 |                | 45.21 | 10.75 | 0   | 0   |

|               |        |         |           |           |                |       |       |     |     |
|---------------|--------|---------|-----------|-----------|----------------|-------|-------|-----|-----|
| <b>IT-MBo</b> | Italy  | GR<br>A | 46.0<br>1 | 11.0<br>5 | 2003 –<br>2018 | 46.00 | 11.04 | 616 | 582 |
| <b>IT-Ren</b> | Italy  | ENF     | 46.5<br>9 | 11.4<br>3 | 1999 –<br>2018 | 46.58 | 11.44 | 531 | 525 |
| <b>IT-SR2</b> | Italy  | ENF     | 43.7<br>3 | 10.2<br>9 | 2013 –<br>2018 | 43.74 | 10.31 | 255 | 214 |
| <b>IT-Tor</b> | Italy  | GR<br>A | 45.8<br>4 | 7.58      | 2008 –<br>2018 | 45.85 | 7.57  | 481 | 251 |
| <b>RU-Fy2</b> | Russia | ENF     | 56.4<br>5 | 32.9<br>0 | 2015 –<br>2018 | 56.46 | 32.89 | 156 | 138 |
| <b>SE-Htm</b> | Sweden | ENF     | 56.1<br>0 | 13.4<br>2 | 2015 –<br>2018 | 56.10 | 13.42 | 177 | 152 |
| <b>SE-Nor</b> | Sweden | ENF     | 60.0<br>9 | 17.4<br>8 | 2014 –<br>2018 | 60.09 | 17.50 | 229 | 181 |
| <b>SE-Svb</b> | Sweden | ENF     | 64.2<br>6 | 19.7<br>7 | 2014 –<br>2018 | 64.26 | 19.77 | 161 | 109 |

1170

**Table S2: The root mean square error (RMSE) and percent bias (PBIAS) for model evapotranspiration (ET) in relation to the Integrated Carbon Observation System (ICOS) observations. Stations from ICOS that did not belong to plant functional types (PFTs) of evergreen needleleaf forest (ENF), broadleaf deciduous forest (DBF), croplands (CRO), or grasslands (GRA) or did not have overlapping periods were omitted. See Section 2.4.2. For the amount of data points per station used for the calculations, see Table S1.**

1175

|               | ET RMSE [mm day <sup>-1</sup> ] |                     |       |       |       | ET PBIAS [%]         |                     |        |        |       |
|---------------|---------------------------------|---------------------|-------|-------|-------|----------------------|---------------------|--------|--------|-------|
|               | CLM5 <sub>grid</sub>            | CLM5 <sub>PFT</sub> | ERA5L | GLASS | GLEAM | CLM5 <sub>grid</sub> | CLM5 <sub>PFT</sub> | ERA5L  | GLASS  | GLEAM |
| <b>BE-Bra</b> | 0.54                            | 0.51                | 1.12  | 1.1   | 0.65  | 20.53                | 22.4                | 103.3  | 86.1   | 53.95 |
| <b>BE-Lon</b> | 0.67                            | 0.99                | 0.82  | 0.91  | 0.49  | 12.76                | 24.31               | 66.69  | 43.88  | 19.71 |
| <b>CH-Cha</b> | 0.8                             | 0.85                | 0.59  | 0.54  | 0.56  | -33.03               | -21.19              | -13.73 | -10.68 | -8.47 |

|               |      |      |      |      |      |        |        |        |        |        |
|---------------|------|------|------|------|------|--------|--------|--------|--------|--------|
| <b>CH-Dav</b> | 1.2  | 0.95 | 0.91 | 1.35 | 0.85 | -51.08 | -33.29 | -54.41 | -32.38 | -27.66 |
| <b>CH-Fru</b> | 0.62 | 0.85 | 0.52 | 0.62 | 0.62 | -23.73 | -8.69  | -6.68  | -5.21  | 7.17   |
| <b>CZ-BK1</b> | 0.48 | 0.54 | 0.76 | 0.57 | 0.52 | -23.06 | -26.04 | 29.54  | 19.72  | 25.78  |
| <b>DE-Geb</b> | 0.51 | 0.82 | 0.7  | 0.85 | 0.48 | -7.61  | -5.35  | 64.26  | 40.08  | 14.93  |
| <b>DE-Gri</b> | 0.48 | 0.77 | 0.57 | 0.55 | 0.36 | 2.45   | 11.15  | 33.24  | 20.49  | 9.14   |
| <b>DE-Hai</b> | 0.49 | 0.6  | 0.73 | 0.76 | 0.52 | 2.64   | 8.99   | 58.52  | 46.6   | 31.18  |
| <b>DE-HoH</b> | 0.69 | 0.65 | 0.6  | 0.58 | 0.66 | -28.06 | -16.86 | -1.62  | -10.44 | -24.37 |
| <b>DE-Kli</b> | 0.69 | 1    | 0.79 | 0.74 | 0.63 | 6.77   | 19.04  | 38.9   | 27.7   | 21.78  |
| <b>DE-RuR</b> | 0.39 | 0.76 | 0.6  | 0.54 | 0.45 | -17.86 | 5.37   | 28.01  | 9.89   | 17.22  |
| <b>DE-RuS</b> | 0.78 | 0.97 | 0.68 | 0.55 | 0.68 | -32.8  | -31.45 | 7.9    | -12.81 | -24.98 |
| <b>DE-Tha</b> | 0.62 | 0.5  | 0.72 | 0.71 | 0.48 | 0.59   | -0.52  | 39.68  | 20.84  | 13.92  |
| <b>DK-Sor</b> | 0.6  | 0.6  | 0.57 | 0.66 | 0.5  | -26.29 | -14.98 | 42.64  | 20.57  | 2.18   |
| <b>FI-Hyy</b> | 0.5  | 0.51 | 0.49 | 0.41 | 0.62 | -35.58 | -27.65 | 20.64  | 11.27  | 41.7   |
| <b>FI-Let</b> | 0.68 | 0.65 | 0.63 | 0.8  | 0.73 | -31.77 | -21.53 | 51.02  | 11.16  | 40.21  |
| <b>FI-Var</b> | 0.37 | 0.49 | 0.73 | 0.48 | 0.6  | -30.13 | -9.59  | 67.09  | 58.22  | 84.39  |
| <b>FR-Aur</b> | 0.85 | 1.19 | 1.1  | 1.05 | 0.78 | 5.44   | 45.08  | 52.04  | 37.1   | 16.89  |
| <b>FR-Bil</b> | 0.67 | 0.92 | 1.46 | 0.72 | 0.67 | -25.5  | -28.35 | 24.98  | 48.24  | 24.47  |
| <b>FR-Gri</b> | 0.77 | 1.01 | 0.9  | 0.85 | 0.58 | -1.63  | 0.98   | 44.94  | 30.06  | 3.86   |
| <b>FR-Hes</b> | 0.58 | 0.67 | 0.83 | 0.86 | 0.72 | 0.19   | 13.09  | 51.71  | 35.65  | 36.79  |
| <b>FR-Lam</b> | 0.86 | 1.09 | 0.97 | 1.01 | 0.79 | -6.76  | 20.9   | 31.79  | 17.15  | -1.53  |
| <b>FR-Tou</b> | 0.69 | 0.89 | 0.86 | 1.04 | 0.49 | -36.01 | -45.95 | 60.87  | 30.99  | 17.48  |
| <b>IT-MBo</b> | 0.55 | 0.84 | 0.5  | 0.49 | 0.72 | -2.29  | -17.01 | 8.99   | 6.24   | 16.68  |
| <b>IT-Ren</b> | 0.85 | 0.81 | 0.74 | 0.72 | 0.76 | -23.81 | -3.55  | -9.57  | -15.41 | 2.18   |
| <b>IT-SR2</b> | 0.89 | 1.53 | 0.73 | 0.76 | 0.8  | -34.1  | -60.81 | 28.98  | 3.25   | -23.83 |

|               |      |      |      |      |      |        |        |        |        |        |
|---------------|------|------|------|------|------|--------|--------|--------|--------|--------|
| <b>IT-Tor</b> | 0.91 | 1.01 | 0.6  | 0.78 | 0.75 | -45.19 | -48.2  | -38.59 | -10.22 | -28.59 |
| <b>RU-Fy2</b> | 0.4  | 0.51 | 0.65 | 0.69 | 0.7  | -4.43  | -16.31 | 52.09  | 26.21  | 54.79  |
| <b>SE-Htm</b> | 0.45 | 0.45 | 1.19 | 0.88 | 0.9  | -7.31  | -3.36  | 72.78  | 61.52  | 79.05  |
| <b>SE-Nor</b> | 0.36 | 0.37 | 0.66 | 0.58 | 0.59 | -14.29 | -4.12  | 47.2   | 22.25  | 46.44  |
| <b>SE-Svb</b> | 0.45 | 0.64 | 0.55 | 0.35 | 0.56 | -18.82 | -0.66  | 16.38  | 16.8   | 35.55  |

Table S3: The root mean square error (RMSE) and percent bias (PBIAS) for model gross primary production (GPP) in relation to the Integrated Carbon Observation System (ICOS) observations. Stations from ICOS that did not belong to the plant functional types (PFTs) of evergreen needleleaf forest (ENF), deciduous broadleaf forest (DBF), croplands (CRO), or grasslands (GRA) or did not have overlapping periods were omitted. See Section 2.4.2. For the amount of data points per station used for the calculations, see Table S1.

|               | GPP RMSE [g C day <sup>-1</sup> ] |                    |       | GPP PBIAS [%]       |                    |        |
|---------------|-----------------------------------|--------------------|-------|---------------------|--------------------|--------|
|               | CLM5 <sub>gri</sub>               | CLM5 <sub>PF</sub> | GLASS | CLM5 <sub>gri</sub> | CLM5 <sub>PF</sub> | GLASS  |
|               | d                                 | T                  |       | d                   | T                  |        |
| <b>BE-Bra</b> | 2.29                              | 1.69               | 1.3   | -35.36              | 0.58               | 4.7    |
| <b>BE-Dor</b> | 3.19                              | 3.39               | 2.74  | -41.69              | -40.3              | -35.11 |
| <b>BE-Lon</b> | 4.31                              | 4.31               | 3.98  | -18.21              | -8.23              | -11.32 |
| <b>CH-Cha</b> | 4.61                              | 3.94               | 4.29  | -50.9               | -38.52             | -47.17 |
| <b>CH-Dav</b> | 2.4                               | 2.13               | 2.13  | -16.93              | 31.37              | -25.57 |
| <b>CH-Fru</b> | 3.6                               | 2.84               | 2.62  | -40.1               | -23.16             | -23.97 |
| <b>CH-Oe2</b> | 3.75                              | 3.95               | 3.53  | -10.8               | -12.63             | 2.72   |
| <b>CZ-BK1</b> | 2.79                              | 2.31               | 1.95  | -37.05              | -22.83             | -20.65 |
| <b>CZ-Lnz</b> | 4.64                              | 3.44               | 2.9   | -62.06              | -49.31             | -28.91 |
| <b>DE-Geb</b> | 3.63                              | 4.32               | 2.98  | -35.96              | -40.43             | -1.84  |
| <b>DE-Gri</b> | 2.61                              | 2.68               | 2.02  | -21.19              | -11.94             | -9.65  |
| <b>DE-Hai</b> | 2.83                              | 2.59               | 1.7   | -34.83              | -42.5              | -1.51  |
| <b>DE-HoH</b> | 2.94                              | 2.51               | 3.04  | -30.53              | -40.55             | -27.82 |
| <b>DE-Kli</b> | 3.5                               | 3.66               | 3.15  | 1.74                | 2.04               | -2.73  |
| <b>DE-RuR</b> | 2.4                               | 2.39               | 2     | -26.99              | -10.45             | -19.5  |
| <b>DE-RuS</b> | 4.74                              | 5.05               | 4.34  | -43.49              | -45.67             | -34.68 |
| <b>DE-RuW</b> | 2.63                              | 2.61               | 2.14  | -32.13              | -27.64             | -23.88 |
| <b>DE-Tha</b> | 1.87                              | 1.48               | 1.29  | -28.99              | -3.95              | -19.27 |



|               |      |      |      |        |        |        |
|---------------|------|------|------|--------|--------|--------|
| <b>DK-Sor</b> | 4.39 | 4.07 | 3.21 | -47.99 | -49.66 | -35.24 |
| <b>FI-Hyy</b> | 1.3  | 1.29 | 0.81 | -14.92 | -0.32  | -8.91  |
| <b>FI-Ken</b> | 1.16 | 2.34 | 0.72 | -2.8   | 54.7   | -14.37 |
| <b>FI-Let</b> | 2.05 | 2.02 | 1.53 | -19.16 | -4.72  | -19.98 |
| <b>FI-Var</b> | 1.4  | 3.22 | 0.89 | 60.3   | 159.3  | 21.48  |
| <b>FR-Aur</b> | 3.28 | 4.05 | 3.25 | 9.39   | 68.57  | 9.03   |
| <b>FR-Bil</b> | 1.75 | 2.23 | 1.67 | -24.81 | -24.43 | -0.67  |
| <b>FR-FBn</b> | 2.38 | 3.73 | 1.82 | -48.88 | -77.01 | 15.32  |
| <b>FR-Fon</b> | 3.1  | 2.87 | 2.74 | -27    | -36.28 | -21.96 |
| <b>FR-Gri</b> | 4.16 | 4.24 | 3.73 | -18.71 | -13.87 | -15.53 |
| <b>FR-Hes</b> | 3.7  | 3.24 | 3.32 | -24.49 | -36.28 | -17.36 |
| <b>FR-Lam</b> | 3.91 | 4.5  | 3.95 | -4.09  | 44.8   | -8.88  |
| <b>FR-Tou</b> | 3.44 | 2.53 | 1.77 | -73.37 | -47.07 | -10.42 |
| <b>IT-MBo</b> | 2.42 | 2.89 | 1.84 | -7.9   | -31.89 | 3.26   |
| <b>IT-Ren</b> | 1.53 | 2.32 | 1.77 | 11.62  | 33.32  | -2.04  |
| <b>IT-SR2</b> | 5.12 | 6.78 | 4.07 | -67.17 | -88.85 | -53.94 |
| <b>IT-Tor</b> | 1.82 | 2.49 | 1.66 | -0.74  | 1.02   | 1.17   |
| <b>RU-Fy2</b> | 2.63 | 2.84 | 1.93 | -26.11 | -22.3  | -23.45 |
| <b>SE-Htm</b> | 2.74 | 2.24 | 1.95 | -38.04 | -25.42 | -26.84 |
| <b>SE-Nor</b> | 1.59 | 1.37 | 1.35 | -25.59 | -3.8   | -21.62 |
| <b>SE-Svb</b> | 1.13 | 2.02 | 1.22 | 5.64   | 25.07  | -24.24 |

Table S4: The evapotranspiration (ET) root mean square error (RMSE) indicates the general model approximations and the percent bias (PBIAS), demonstrating systematic bias of the models (Community Land Model v5 (CLM5) on grid-scale (CLM5<sub>grid</sub>), CLM5 on PFT scale (CLM5<sub>PFT</sub>), from the European Center of Medium-Range Weather Forecasts Reanalysis 5 Land (ERA5-Land), the Global Land Surface Satellite (GLASS), and the Global Land Evaporation Amsterdam Model (GLEAM)) to the observations. Each value corresponds to a group of stations representing the same plant functional type (PFT; Evergreen Needleleaf Forest (ENF), Deciduous Broadleaf Forest (DBF), Grasslands (GRA), and Croplands (CRO)). The amount of data points (N) for each PFT is also indicated.

|                                        | <b>PFT</b>  | <b>N</b> | <b>CLM5<sub>grid</sub></b> | <b>CLM5<sub>PFT</sub></b> | <b>ERA5L</b> | <b>GLASS</b> | <b>GLEAM</b> |
|----------------------------------------|-------------|----------|----------------------------|---------------------------|--------------|--------------|--------------|
| <b>RMSE</b><br>[mm day <sup>-1</sup> ] | <b>ENF</b>  | 5038     | 0.71                       | 0.72                      | 0.84         | 0.83         | 0.67         |
|                                        | <b>DBF</b>  | 1663     | 0.56                       | 0.62                      | 0.73         | 0.70         | 0.56         |
|                                        | <b>GRA</b>  | 2859     | 0.65                       | 0.85                      | 0.60         | 0.57         | 0.59         |
|                                        | <b>CRO</b>  | 3690     | 0.72                       | 1.00                      | 0.88         | 0.86         | 0.63         |
|                                        | <b>mean</b> | 3285     | 0.66                       | 0.80                      | 0.76         | 0.74         | 0.61         |
| <b>PBIAS</b><br>[%]                    | <b>ENF</b>  | 5038     | -20.57                     | -15.42                    | 21.86        | 13.32        | 15.43        |
|                                        | <b>DBF</b>  | 1663     | -9.90                      | -0.54                     | 44.55        | 29.74        | 16.24        |
|                                        | <b>GRA</b>  | 2859     | -18.62                     | -13.94                    | 3.14         | 2.63         | 2.41         |
|                                        | <b>CRO</b>  | 3690     | -3.24                      | 11.20                     | 44.99        | 27.30        | 7.58         |
|                                        | <b>mean</b> | 3285     | -13.08                     | -4.68                     | 28.64        | 18.25        | 10.42        |

1180

Table S5: The gross primary production (GPP) root mean square error (RMSE) indicates the general model approximation and the percent bias (PBIAS), demonstrating systematic bias of the models (Community Land Model v5 (CLM5) on grid-scale (CLM5<sub>grid</sub>), CLM5 on PFT scale (CLM5<sub>PFT</sub>), from the European Center of Medium-Range Weather Forecasts Reanalysis 5 Land (ERA5-Land), the Global Land Surface Satellite (GLASS), and the Global Land Evaporation Amsterdam Model (GLEAM)) to the observations. Each value corresponds to a group of stations representing the same plant functional type (PFT: Evergreen Needleleaf Forest (ENF), Deciduous Broadleaf Forest (DBF), Grasslands (GRA), and Croplands (CRO)). The amount of data points (N) for each PFT is also indicated.

|                                         | <b>PFT</b>  | <b>N</b> | <b>CLM5<sub>grid</sub></b> | <b>CLM5<sub>PFT</sub></b> | <b>GLASS</b> |
|-----------------------------------------|-------------|----------|----------------------------|---------------------------|--------------|
| <b>RMSE</b><br>[g C day <sup>-1</sup> ] | <b>ENF</b>  | 5976     | 2.25                       | 2.44                      | 1.75         |
|                                         | <b>DBF</b>  | 2473     | 3.71                       | 3.35                      | 2.81         |
|                                         | <b>GRA</b>  | 2838     | 3.14                       | 3.01                      | 2.63         |
|                                         | <b>CRO</b>  | 3607     | 3.85                       | 4.21                      | 3.55         |
|                                         | <b>mean</b> | 3723.5   | 3.24                       | 3.25                      | 2.69         |
| <b>PBIAS</b><br>[%]                     | <b>ENF</b>  | 5976     | -26.00                     | -7.7                      | -14.53       |
|                                         | <b>DBF</b>  | 2473     | -38.88                     | -43.76                    | -24.51       |
|                                         | <b>GRA</b>  | 2838     | -30.73                     | -25.5                     | -21.34       |
|                                         | <b>CRO</b>  | 3607     | -14.99                     | -1.48                     | -6.29        |
|                                         | <b>mean</b> | 3723.5   | -27.65                     | -19.61                    | -16.67       |

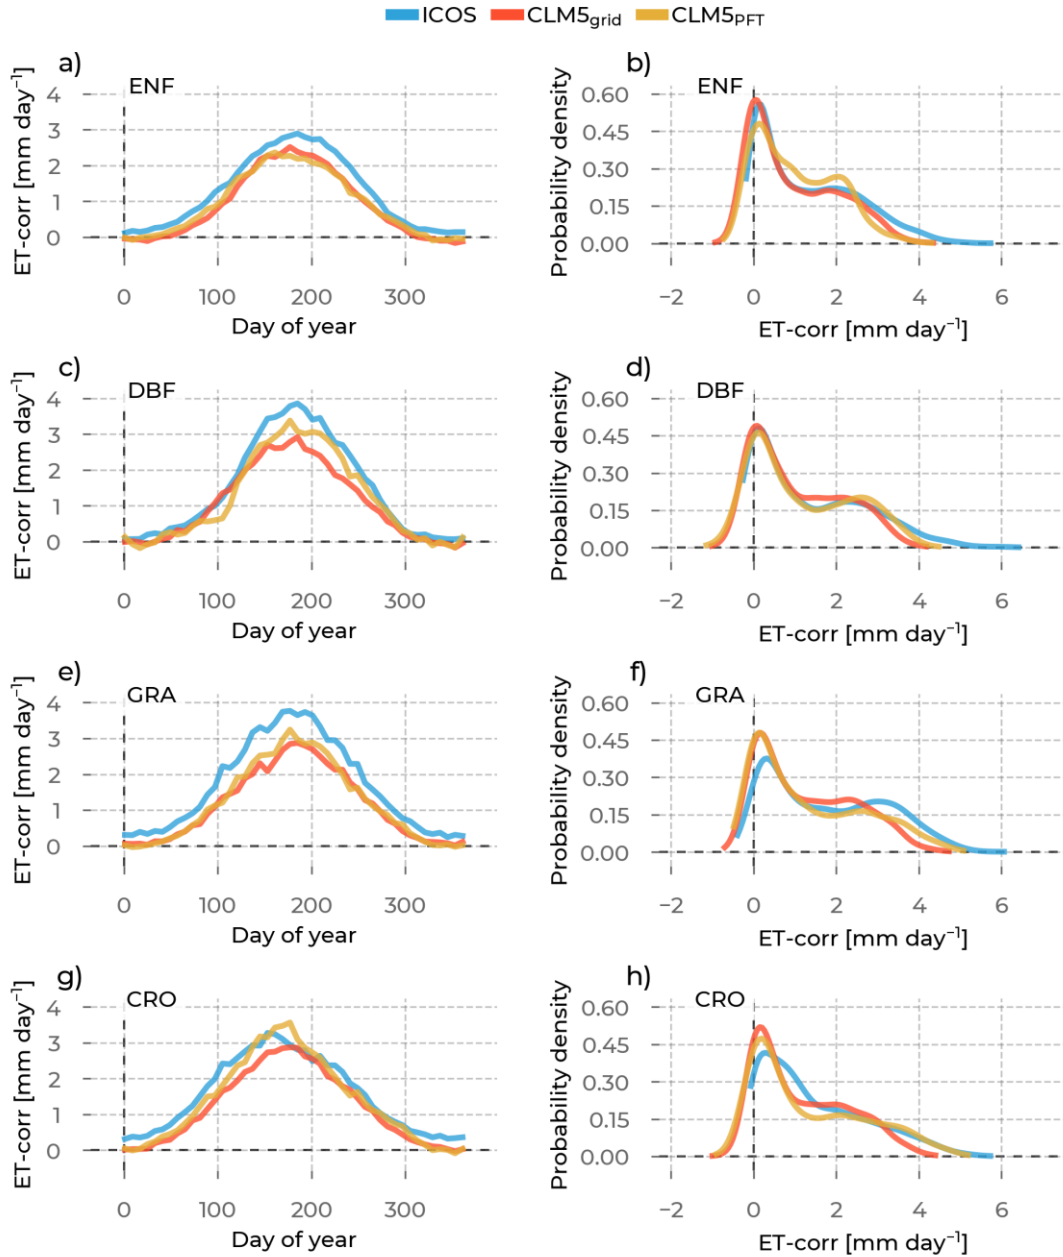

Figure S1: In the left column are the yearly energy balance corrected evapotranspiration ( $ET\text{-corr}$ ) evolutions averaged across stations belonging to one PFT (rows). We differentiate the data source by color (ICOS observations: blue, CLM5<sub>grid</sub>: red, CLM5<sub>PFT</sub>: yellow, GLASS: green, ERA5L: brown, GLEAM: purple). The

*probability density curves for all ET-corr values from stations belonging to the selected PFT are in the right column. Each row shows these plots for one PFT: Evergreen Needleleaf Forest (ENF), Deciduous Broadleaf Forest (DBF), Grasslands (GRA), and Croplands (CRO).*

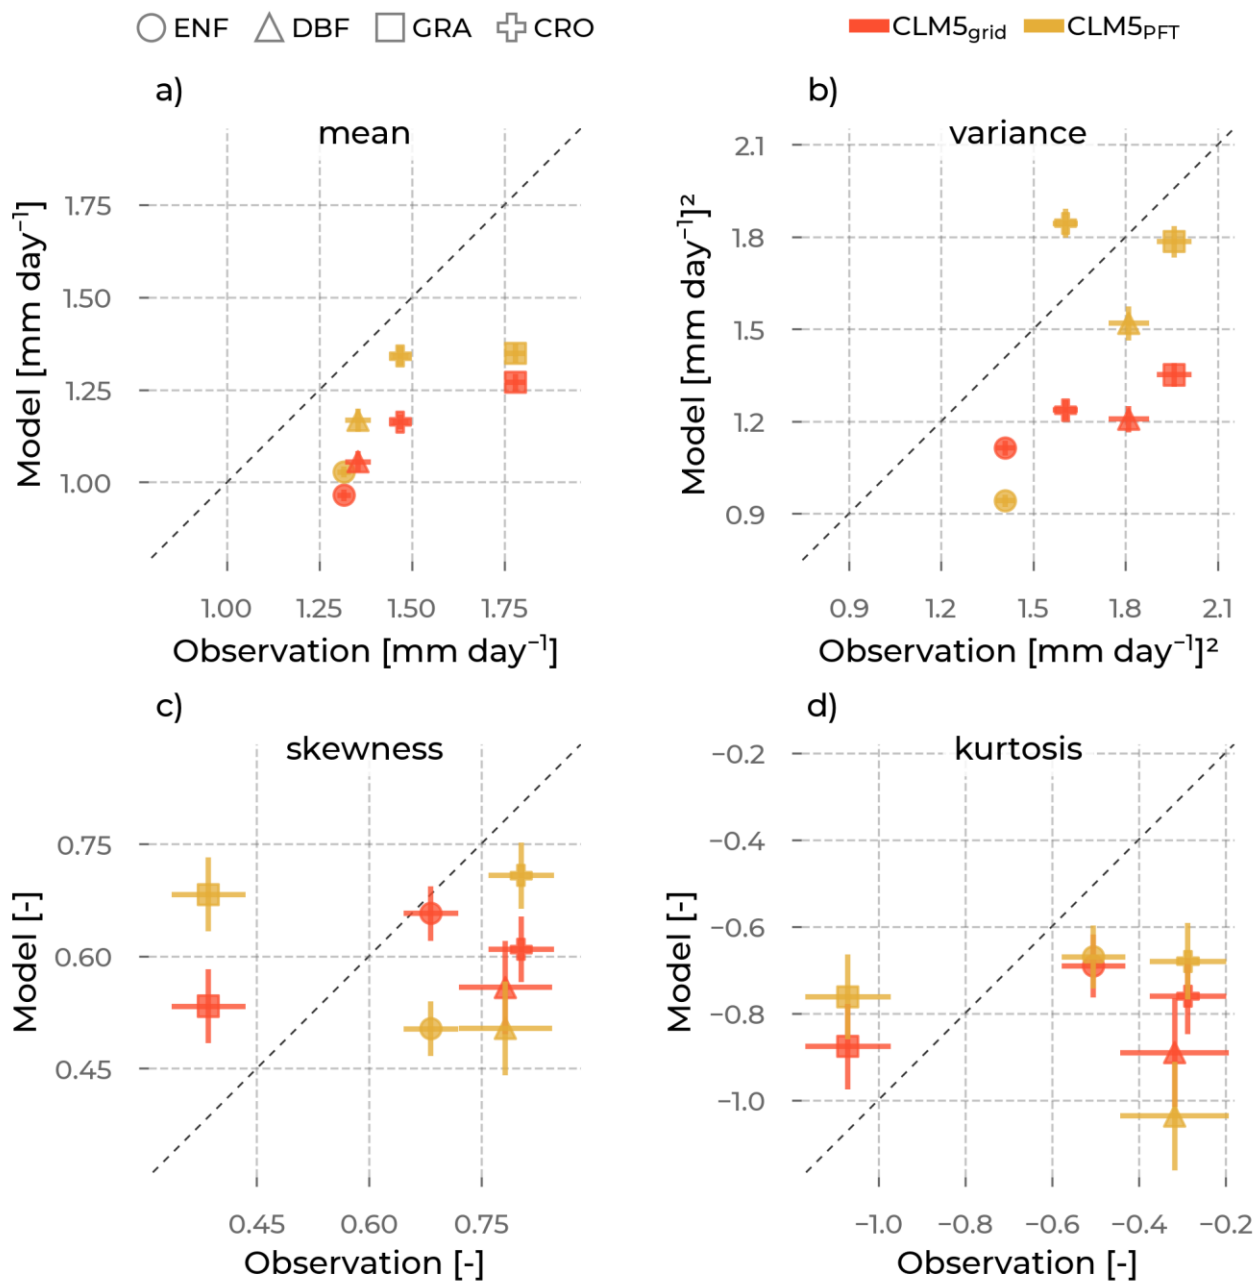

Figure S2: The mean (a), variance (b), skewness (c), and excess kurtosis (d) of the ET-corr distributions (visualized in Figure S1) from the models (color, y-axis), as opposed to the corresponding values from observations (x-axis) aggregated for each PFT (marker type): Evergreen Needleleaf Forest (ENF), Deciduous Broadleaf Forest (DBF),

Grasslands (GRA), Croplands (CRO). The error bars are the standard errors of the respective moment, depending on the sample size.

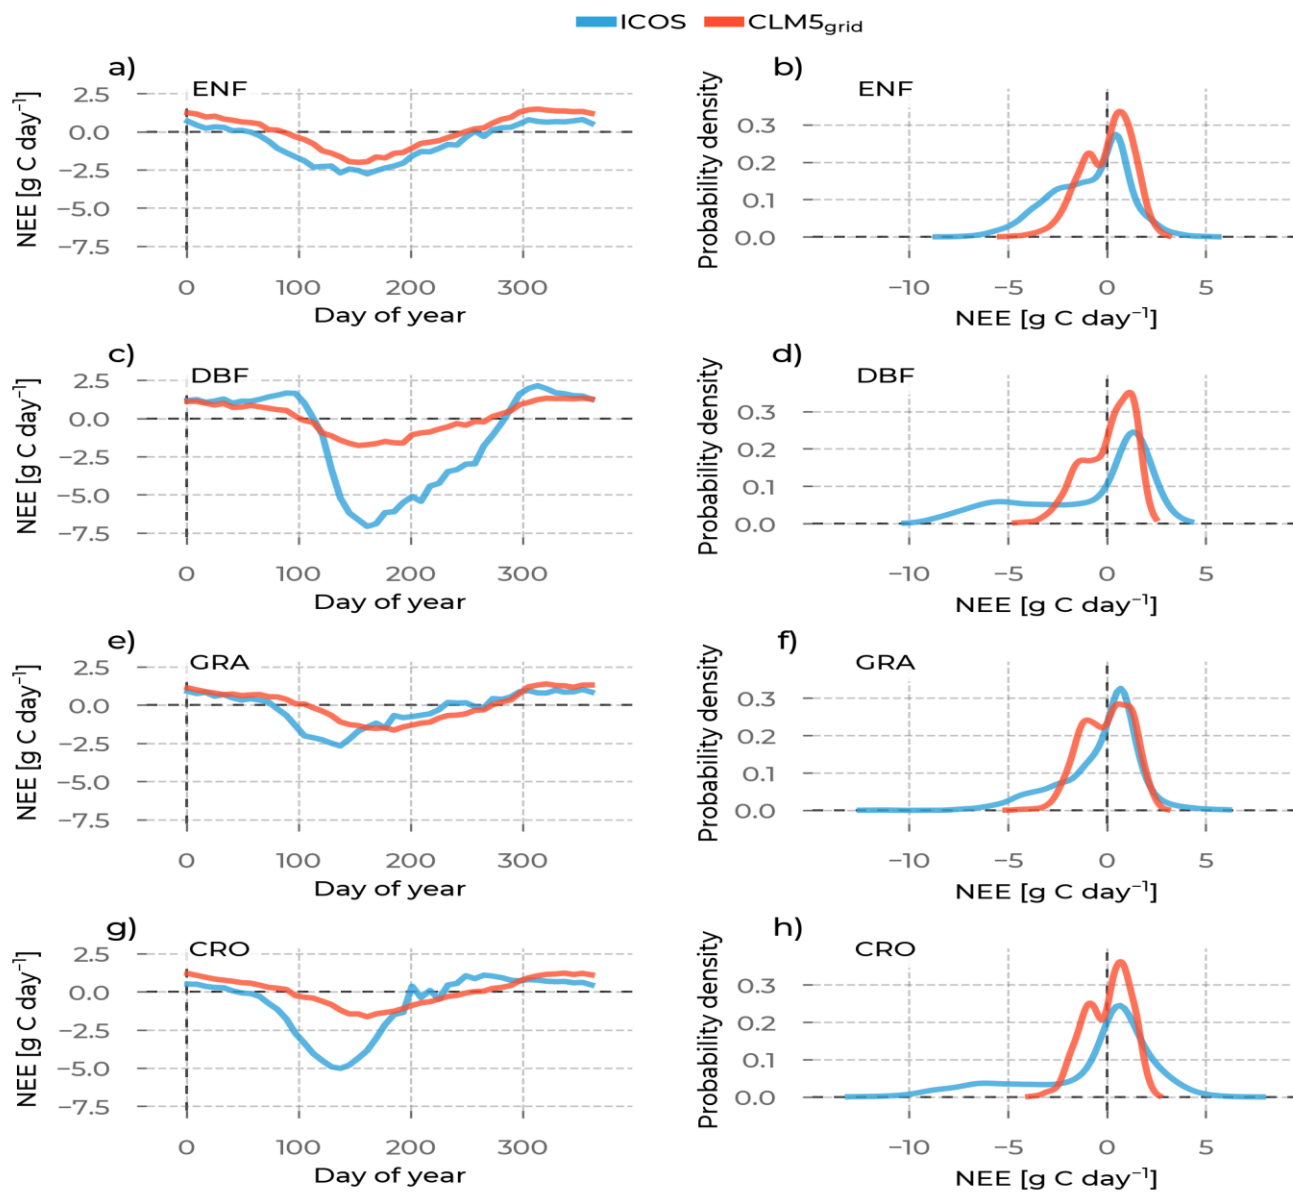

Figure S3: In the left column are the yearly net ecosystem exchange (NEE) evolutions averaged across stations belonging to one PFT (rows). We differentiate the data source by color (ICOS observations: blue, CLM5<sub>grid</sub>: red, CLM5<sub>PFT</sub>: yellow, GLASS: green, ERA5L: brown, GLEAM: purple). The probability density curves for all NEE values from stations belonging to the selected PFT are in the right column. Each row shows these plots for one

*PFT: Evergreen Needleleaf Forest (ENF), Deciduous Broadleaf Forest (DBF), Grasslands (GRA), and Croplands (CRO).*



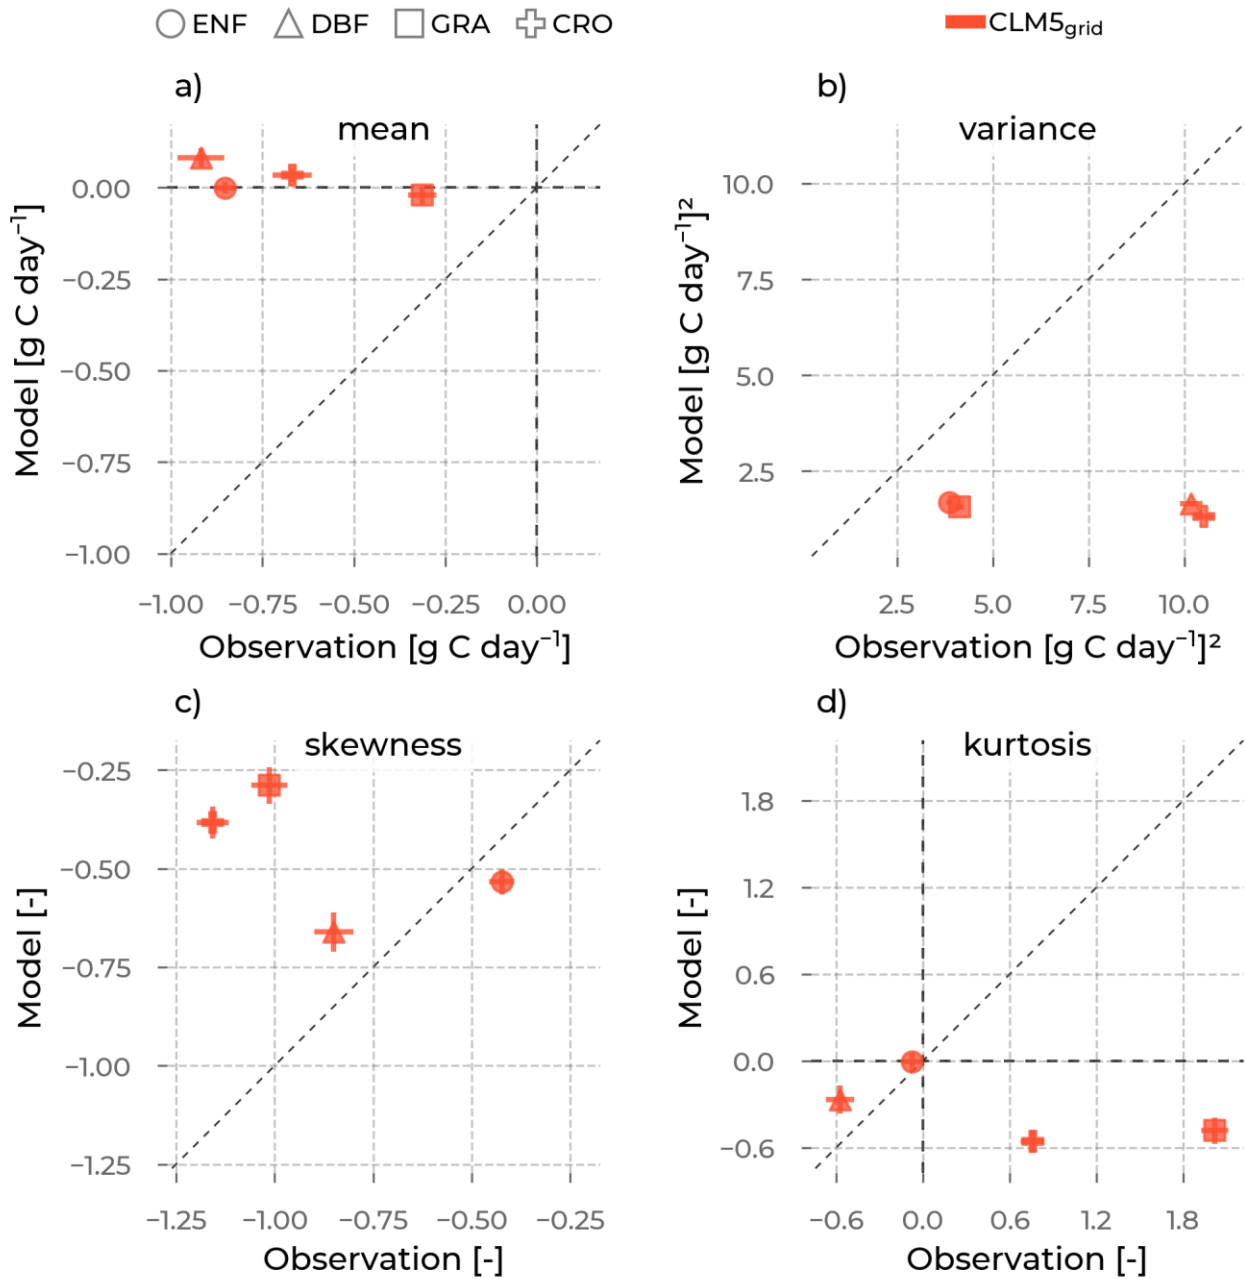

Figure S4: The mean (a), variance (b), skewness (c), and excess kurtosis (d) of the NEE distributions (visualized in Figure S3) from the models (color, y-axis), as opposed to the corresponding values from observations (x-axis) aggregated for each PFT (marker type): Evergreen Needleleaf Forest (ENF), Deciduous Broadleaf Forest (DBF),

*Grasslands (GRA), Croplands (CRO). The error bars are the standard errors of the respective moment, depending on the sample size.*

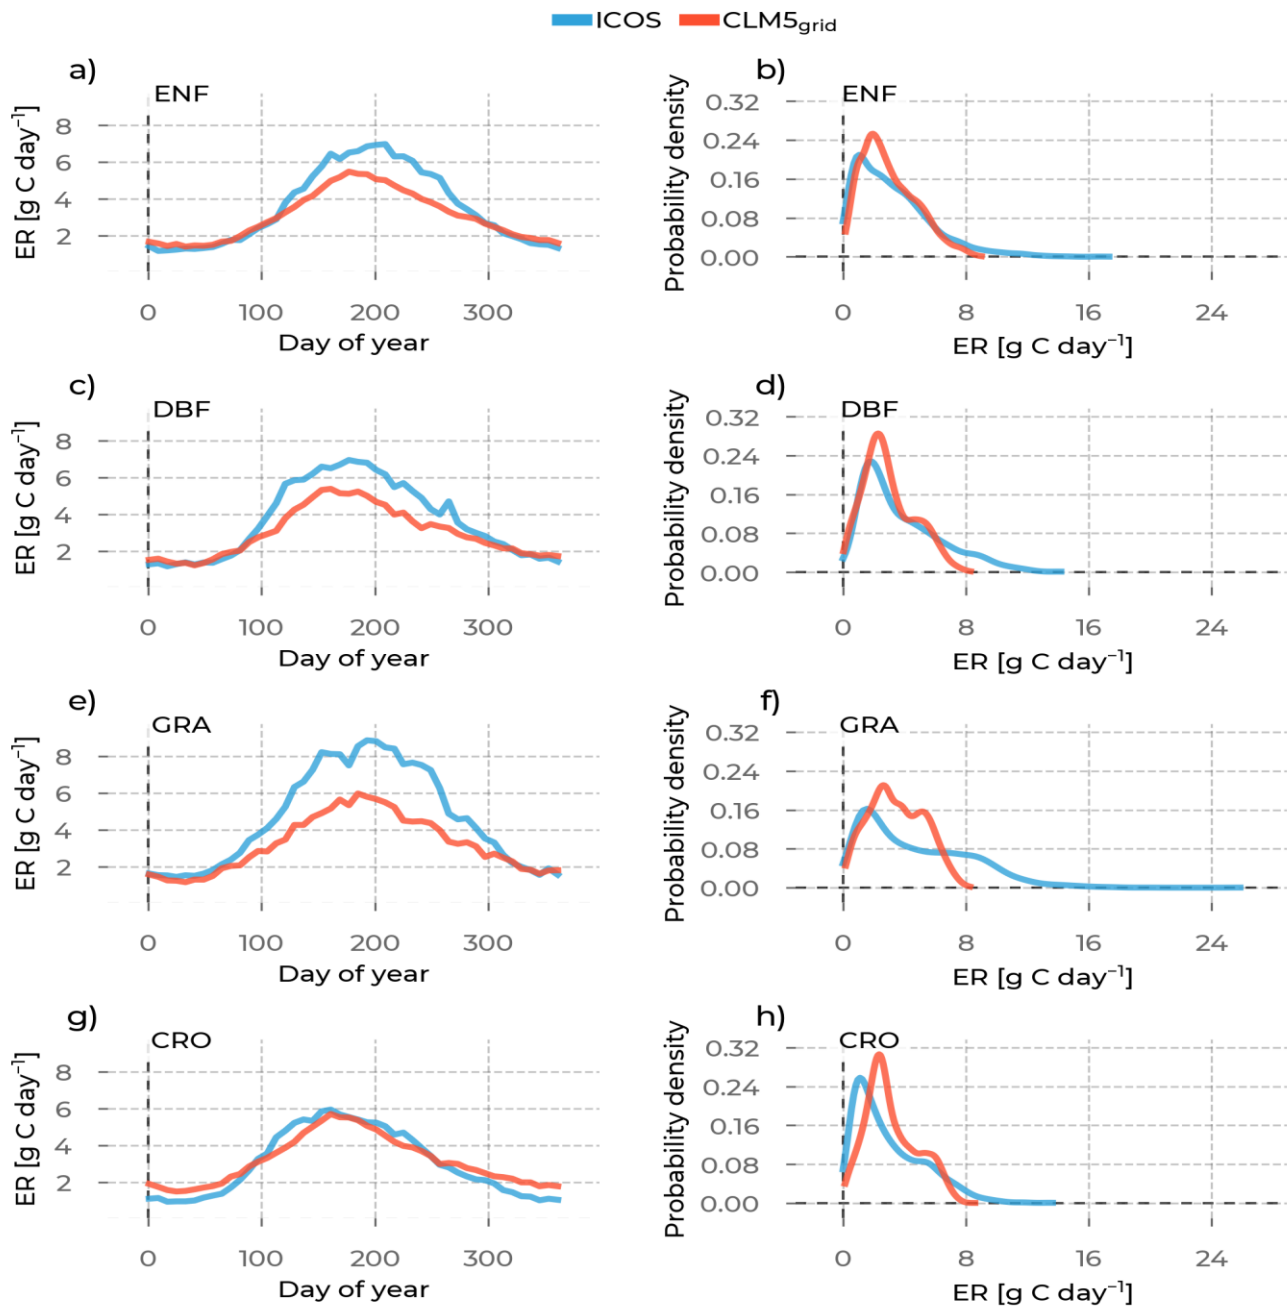

Figure S5: In the left column are the yearly ecosystem respiration (ER) evolutions averaged across stations belonging to one PFT (rows). We differentiate the data source by color (ICOS observations: blue, CLM5<sub>grid</sub>: red, CLM5<sub>PFT</sub>: yellow, GLASS: green, ERA5L: brown, GLEAM: purple). The probability density curves for all ER values from stations belonging to the selected PFT are in the right column. Each row shows these plots for one

*PFT: Evergreen Needleleaf Forest (ENF), Deciduous Broadleaf Forest (DBF), Grasslands (GRA), and Croplands (CRO).*

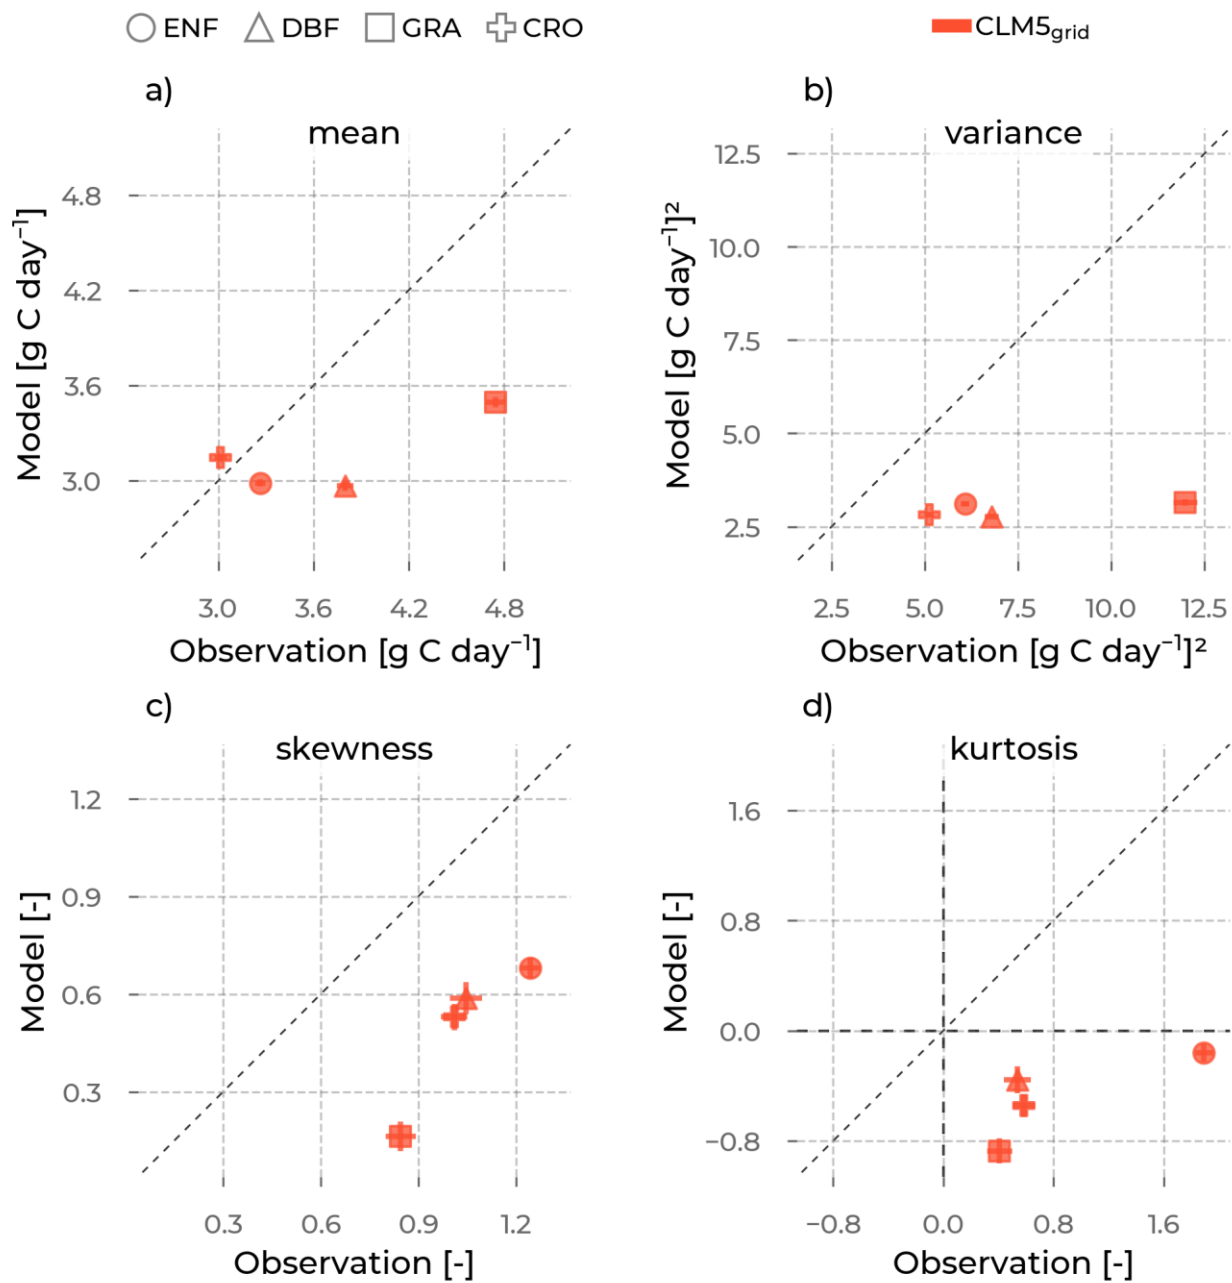

Figure S6: The mean (a), variance (b), skewness (c), and excess kurtosis (d) of the ER distributions (visualized in Figure S5) from the models (color, y-axis), as opposed to the corresponding values from observations (x-axis) aggregated for each PFT (marker type): Evergreen Needleleaf Forest (ENF), Deciduous Broadleaf Forest (DBF),

Grasslands (GRA), Croplands (CRO). The error bars are the standard errors of the respective moment, depending on the sample size.

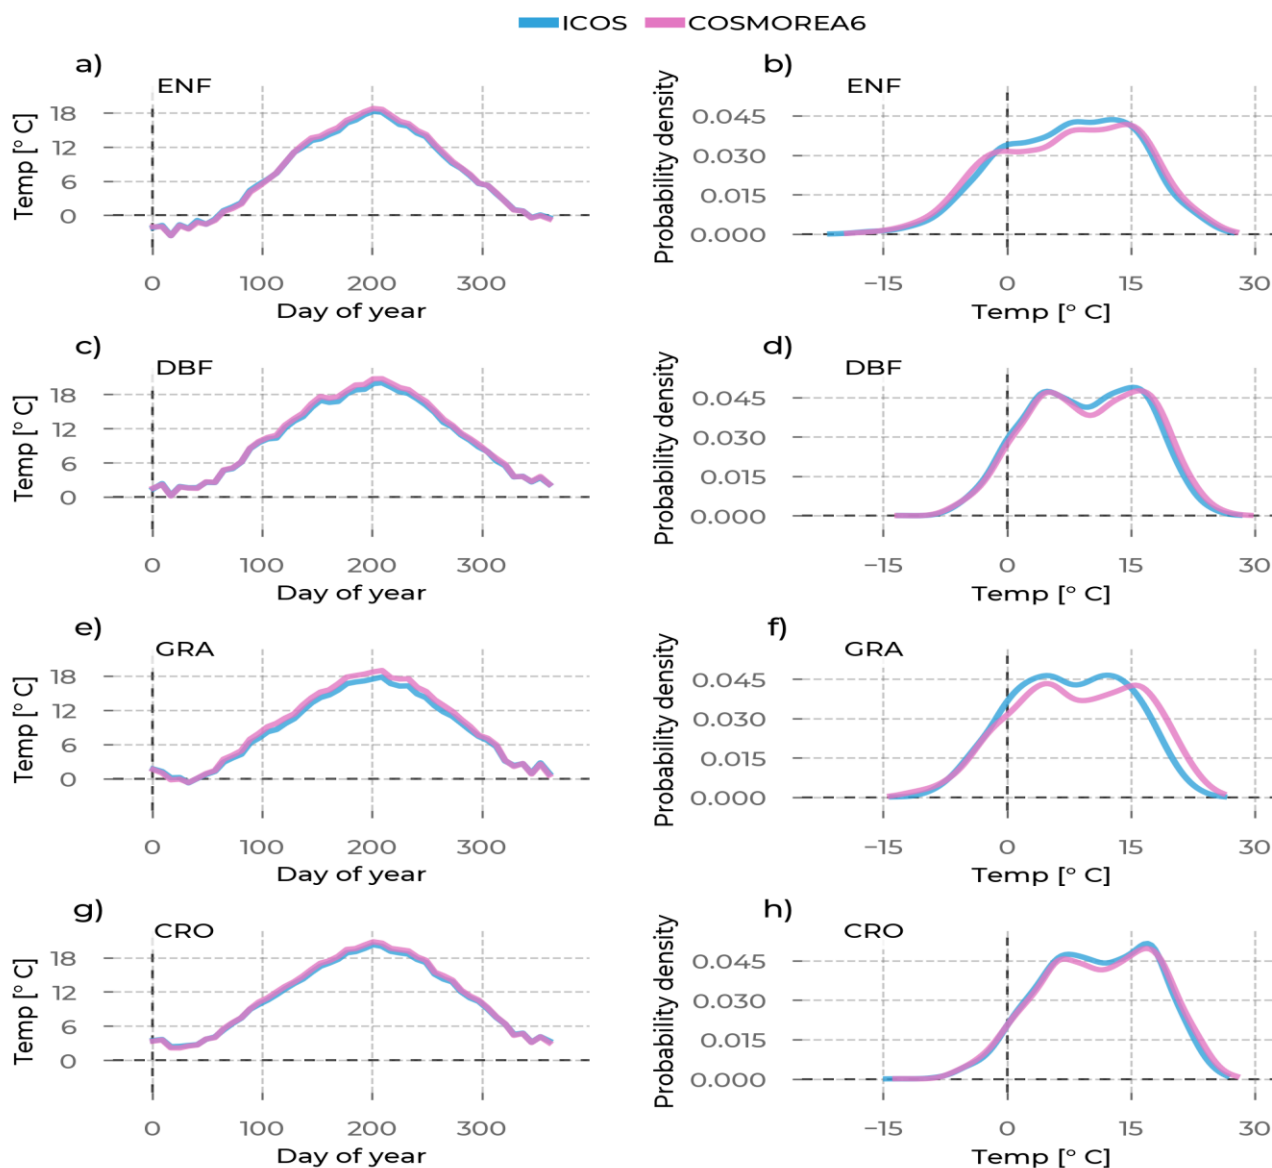

Figure S7: In the left column are the yearly Temperature (Temp) evolutions averaged across stations belonging to one PFT (rows). We differentiate the data source by color (ICOS observations: blue, CLM5<sub>grid</sub>: red, CLM5<sub>PFT</sub>: yellow, GLASS: green, ERA5L: brown, GLEAM: purple). The probability density curves for all Temp values from stations belonging to the selected PFT are in the right column. Each row shows these plots for one PFT: Evergreen Needleleaf Forest (ENF), Deciduous Broadleaf Forest (DBF), Grasslands (GRA), and Croplands (CRO).

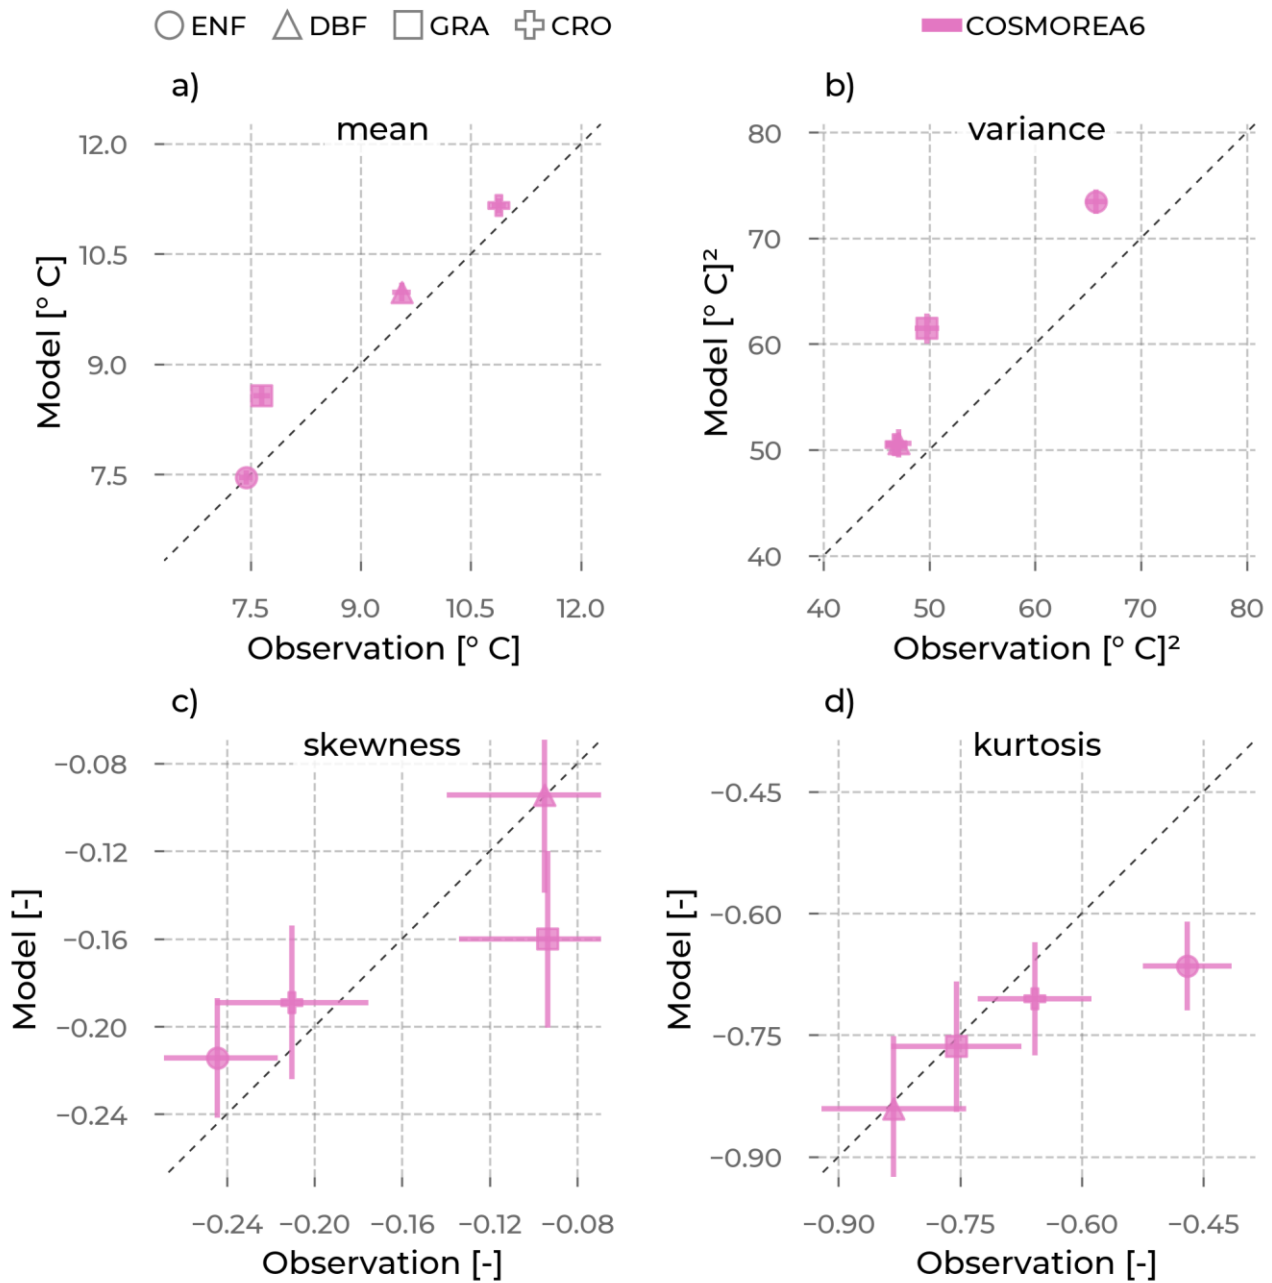

Figure S8: The mean (a), variance (b), skewness (c), and excess kurtosis (d) of the Temp distributions (visualized in Figure S7) from the models (color, y-axis), as opposed to the corresponding values from observations (x-axis) aggregated for each PFT (marker type): Evergreen Needleleaf Forest (ENF), Deciduous Broadleaf Forest (DBF),

Grasslands (GRA), Croplands (CRO). The error bars are the standard errors of the respective moment, depending on the sample size.

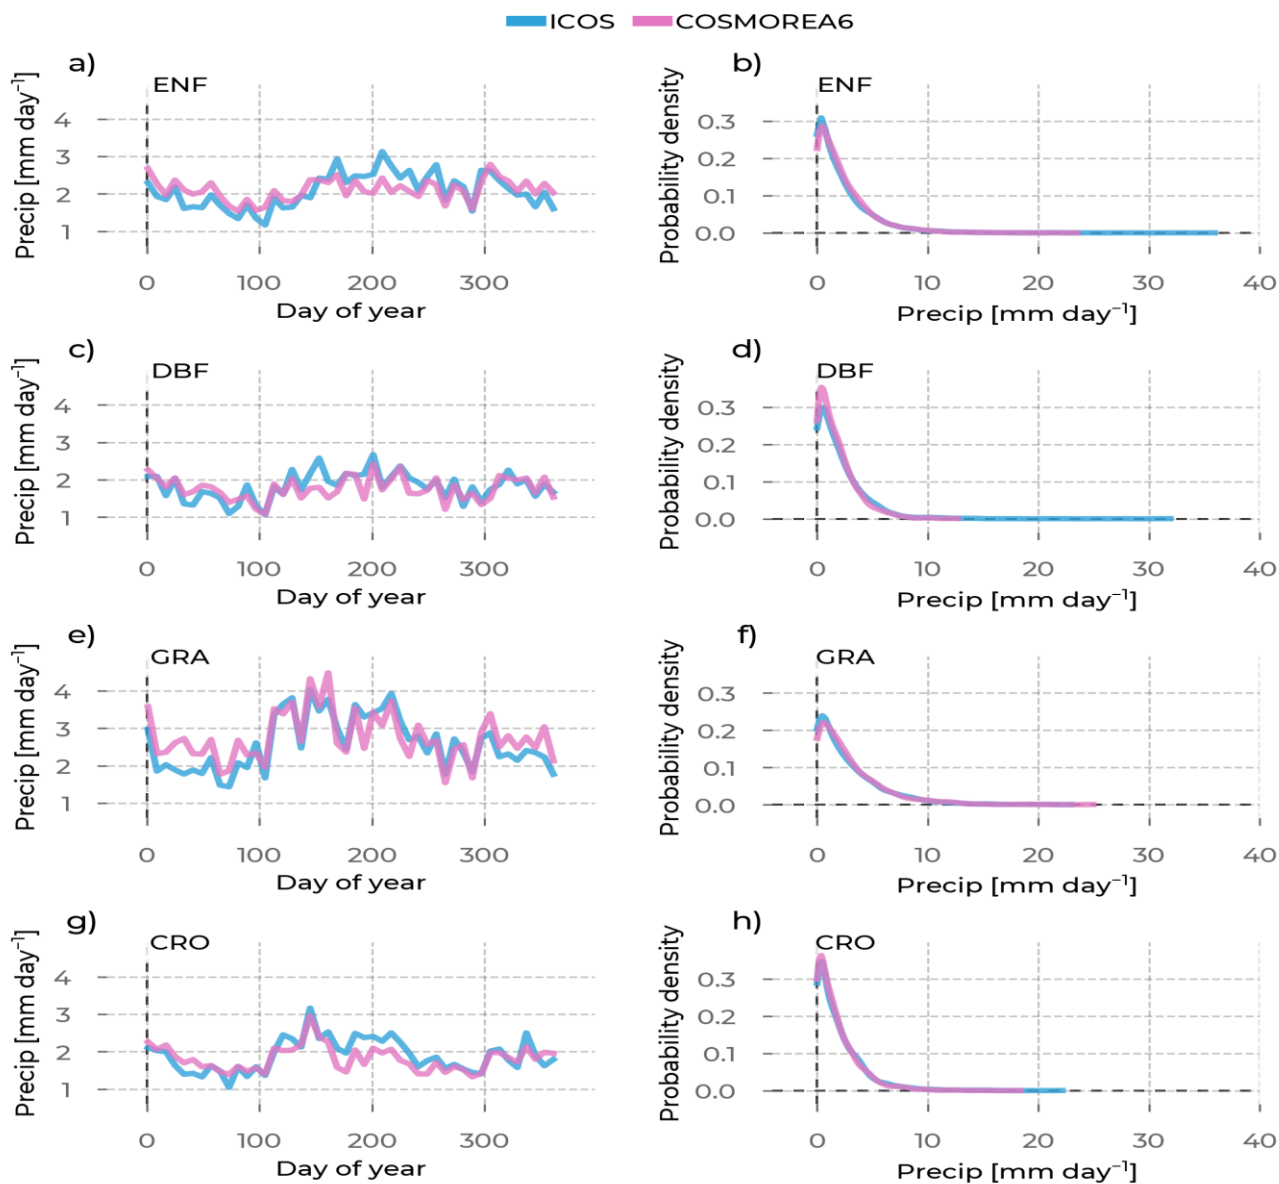

1190

Figure S9: In the left column are the yearly Precipitation (Precip) evolutions averaged across stations belonging to one PFT (rows). We differentiate the data source by color (ICOS observations: blue, CLM5<sub>grid</sub>: red, CLM5<sub>PFT</sub>: yellow, GLASS: green, ERA5L: brown, GLEAM: purple). The probability density curves for all Precip values from



*stations belonging to the selected PFT are in the right column. Each row shows these plots for one PFT: Evergreen Needleleaf Forest (ENF), Deciduous Broadleaf Forest (DBF), Grasslands (GRA), and Croplands (CRO).*

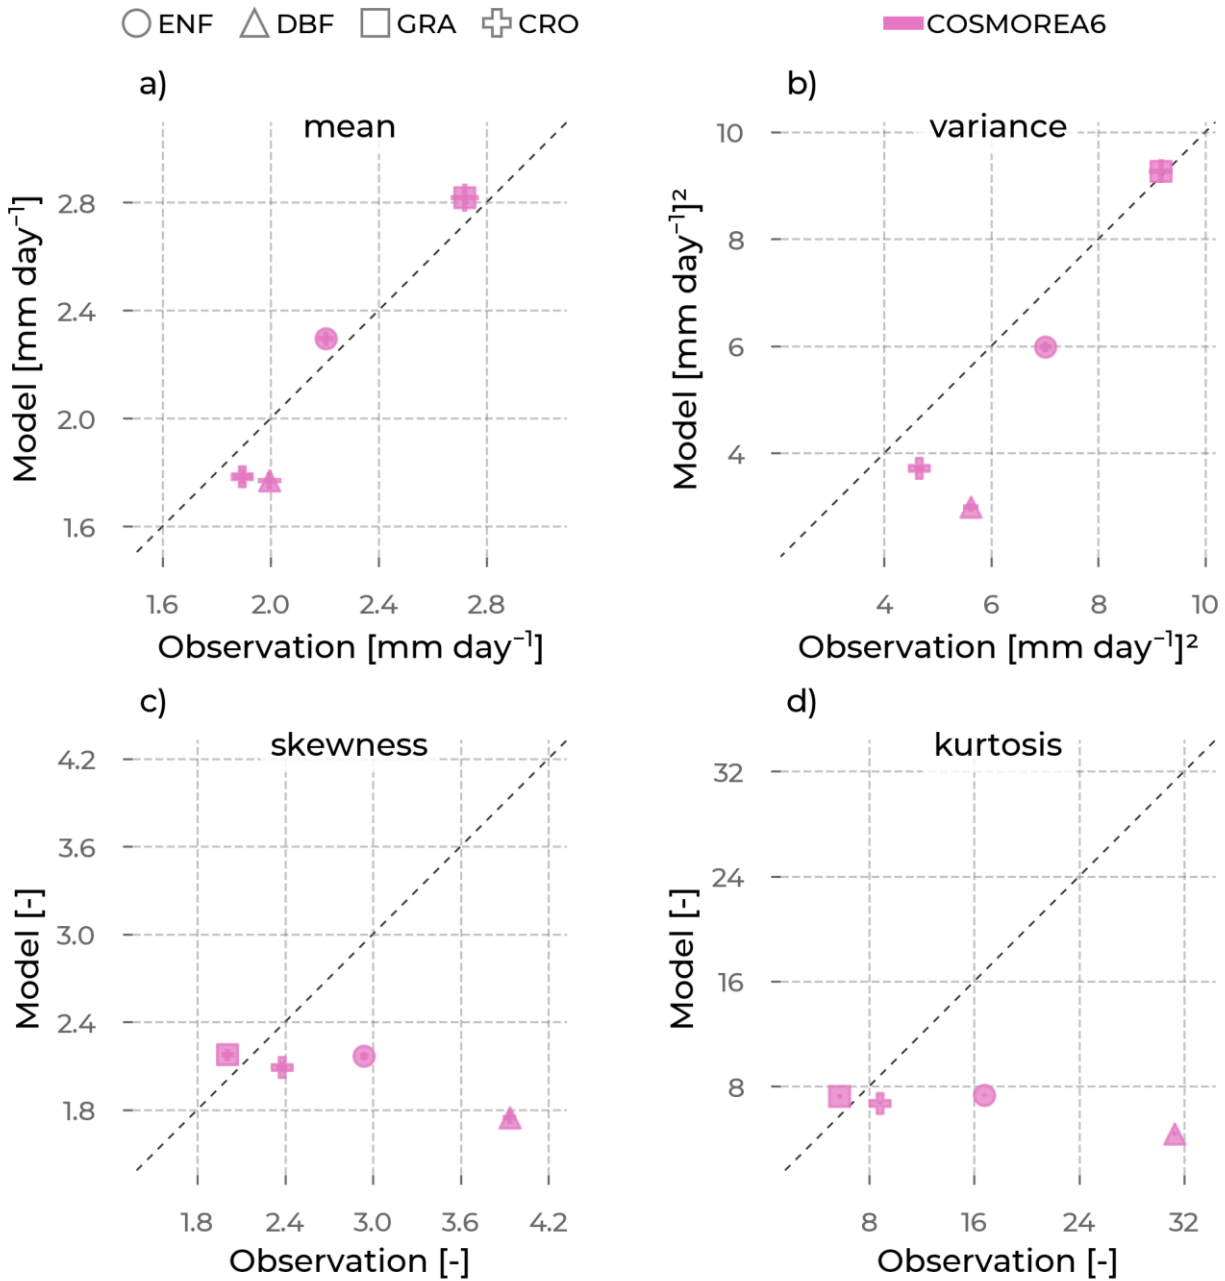

Figure S10: The mean (a), variance (b), skewness (c), and excess kurtosis (d) of the Precip distributions (visualized in Figure S9) from the models (color, y-axis), as opposed to the corresponding values from observations (x-axis) aggregated for each PFT (marker type): Evergreen Needleleaf Forest (ENF), Deciduous Broadleaf Forest (DBF),

Grasslands (GRA), Croplands (CRO). The error bars are the standard errors of the respective moment, depending on the sample size.

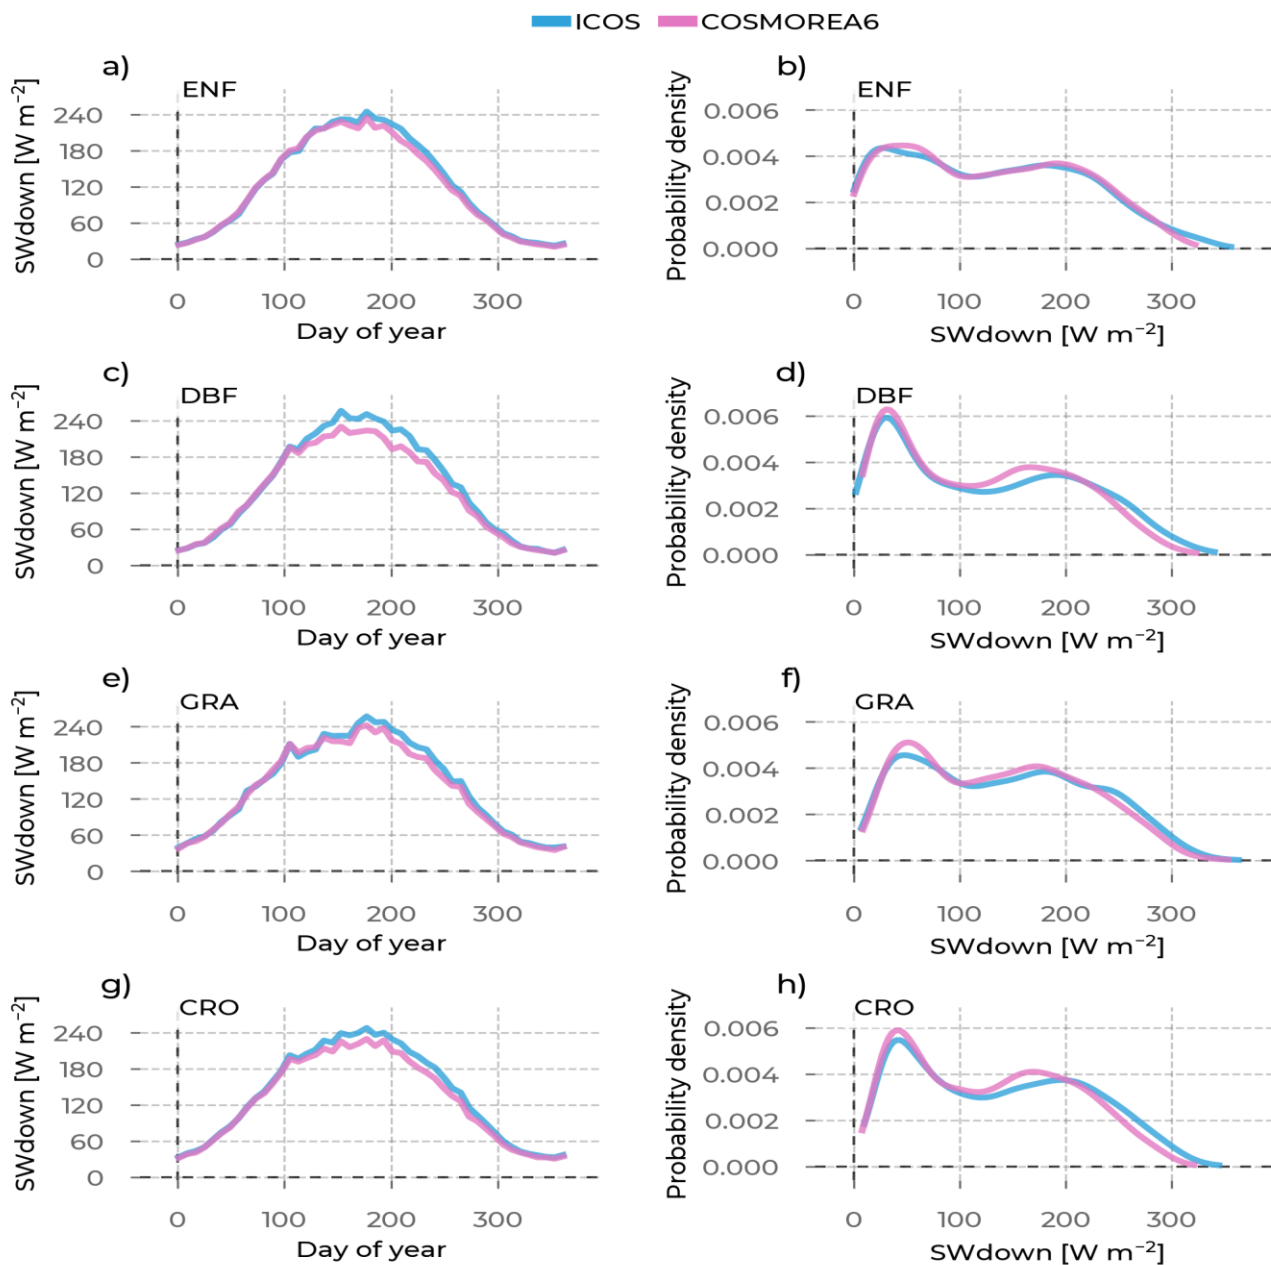

Figure S11: In the left column are the yearly shortwave downward radiation (SWdown) evolutions averaged across stations belonging to one PFT (rows). We differentiate the data source by color (ICOS observations: blue,

*CLM5<sub>grid</sub>: red, CLM5<sub>PFT</sub>: yellow, GLASS: green, ERA5L: brown, GLEAM: purple). The probability density curves for all SWdown values from stations belonging to the selected PFT are in the right column. Each row shows these plots for one PFT: Evergreen Needleleaf Forest (ENF), Deciduous Broadleaf Forest (DBF), Grasslands (GRA), and Croplands (CRO).*

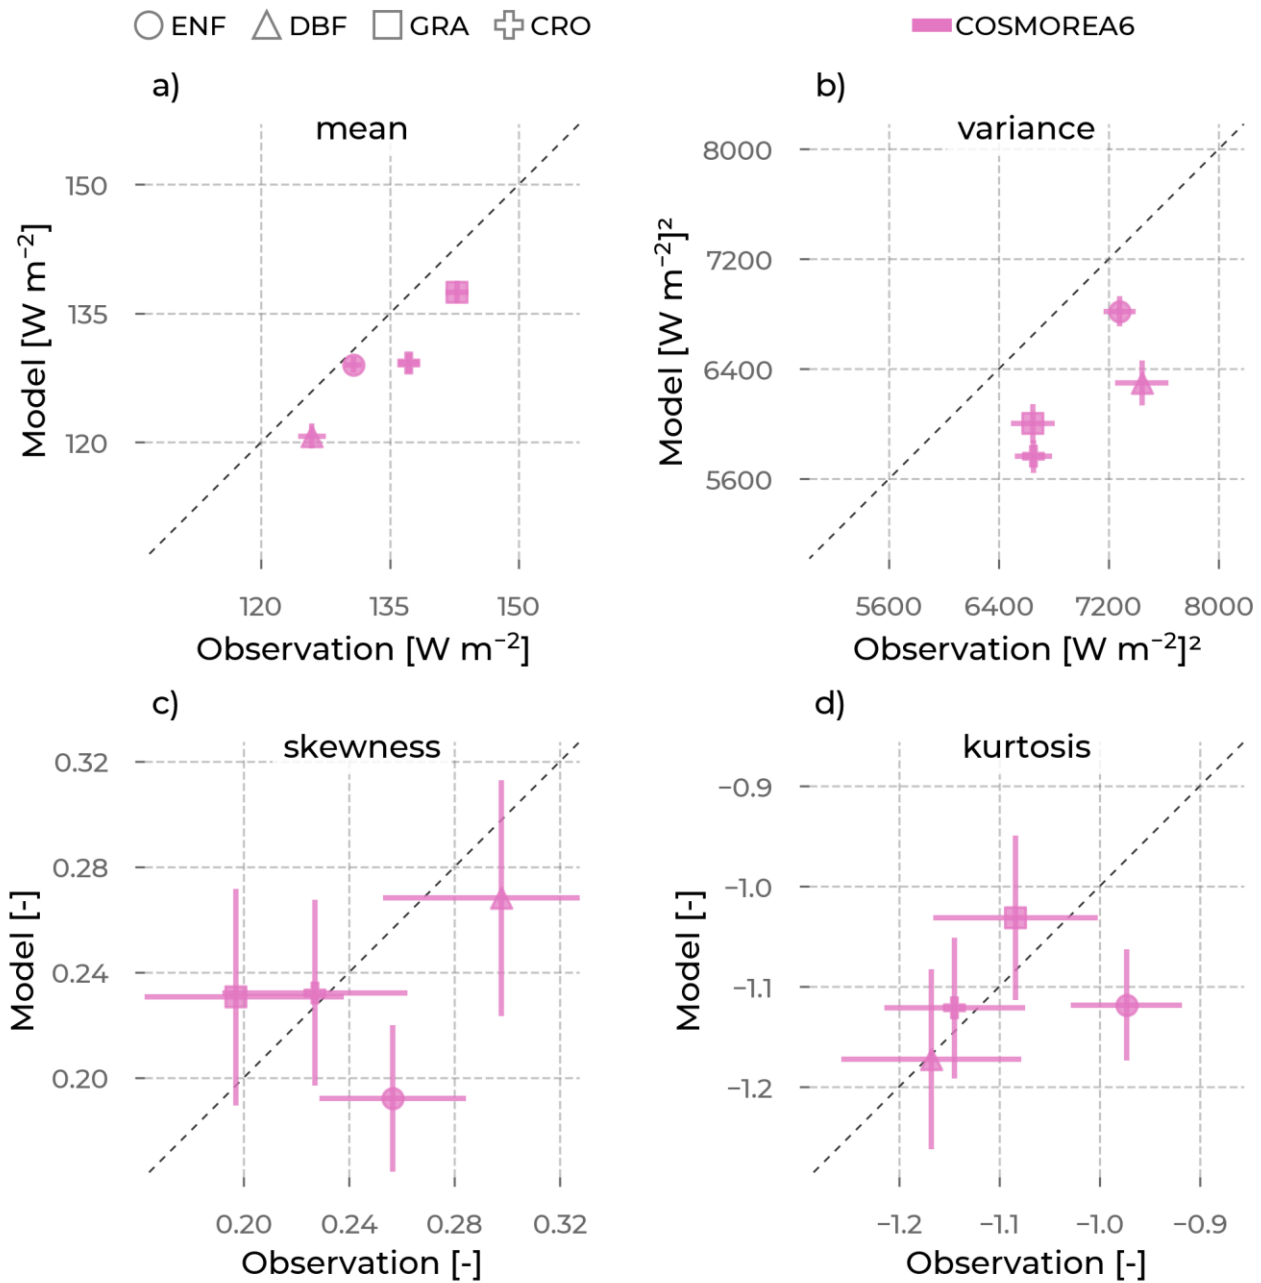

Figure S12: The mean (a), variance (b), skewness (c), and excess kurtosis (d) of the SWdown distributions (visualized in Figure S11) from the models (color, y-axis), as opposed to the corresponding values from observations (x-axis) aggregated for each PFT (marker type): Evergreen Needleleaf Forest (ENF), Deciduous

*Broadleaf Forest (DBF), Grasslands (GRA), Croplands (CRO). The error bars are the standard errors of the respective moment, depending on the sample size.*

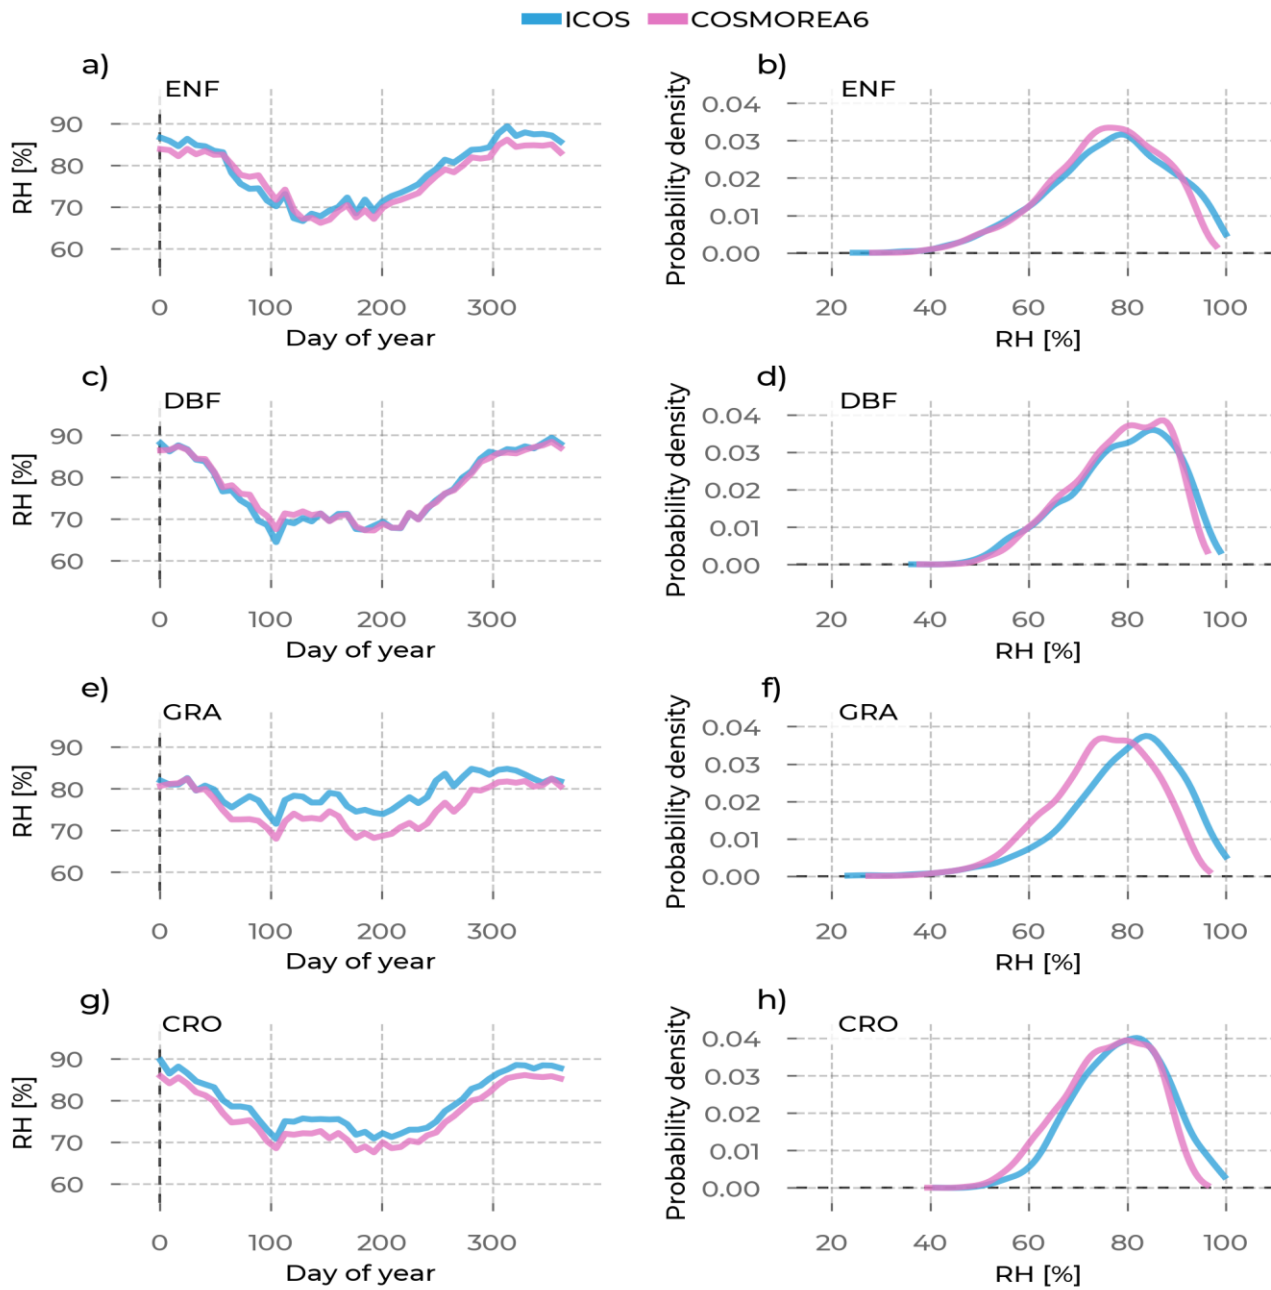

Figure S13: In the left column are the yearly relative humidity (RH) evolutions averaged across stations belonging to one PFT (rows). We differentiate the data source by color (ICOS observations: blue, CLM5<sub>grid</sub>: red, CLM5<sub>PFT</sub>: yellow, GLASS: green, ERA5L: brown, GLEAM: purple). The probability density curves for all RH values from

*stations belonging to the selected PFT are in the right column. Each row shows these plots for one PFT: Evergreen Needleleaf Forest (ENF), Deciduous Broadleaf Forest (DBF), Grasslands (GRA), and Croplands (CRO).*



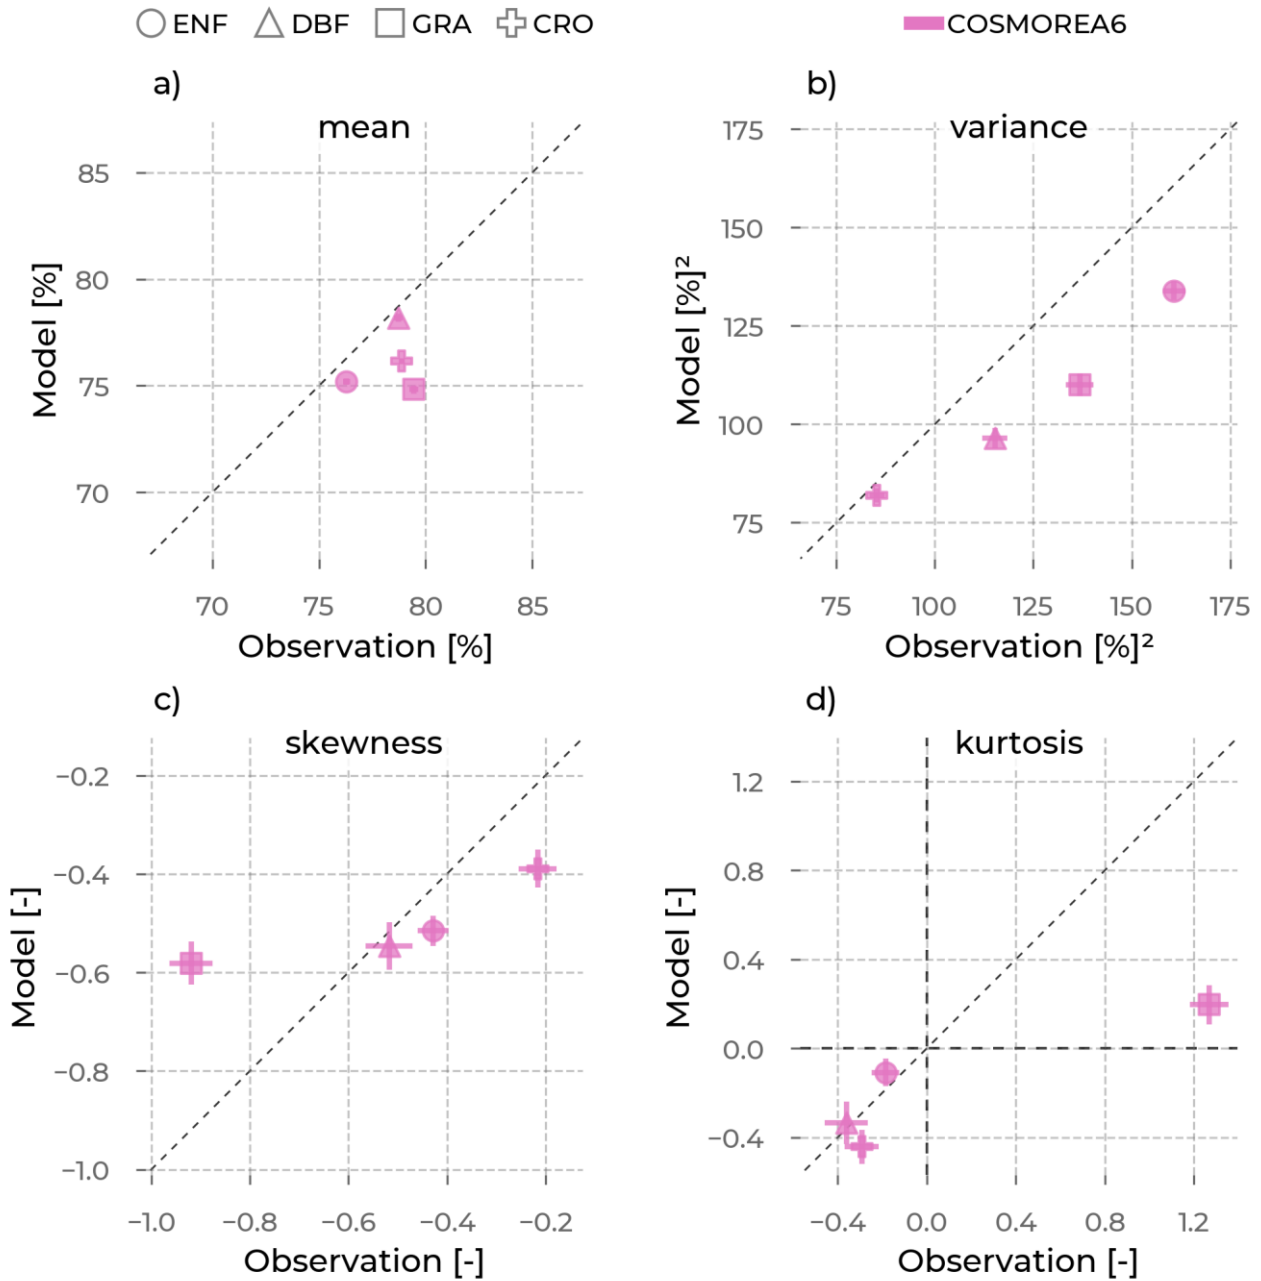

Figure S14: The mean (a), variance (b), skewness (c), and excess kurtosis (d) of the RH distributions (visualized in Figure S13) from the models (color, y-axis), as opposed to the corresponding values from observations (x-axis) aggregated for each PFT (marker type): Evergreen Needleleaf Forest (ENF), Deciduous Broadleaf Forest (DBF),

*Grasslands (GRA), Croplands (CRO). The error bars are the standard errors of the respective moment, depending on the sample size.*

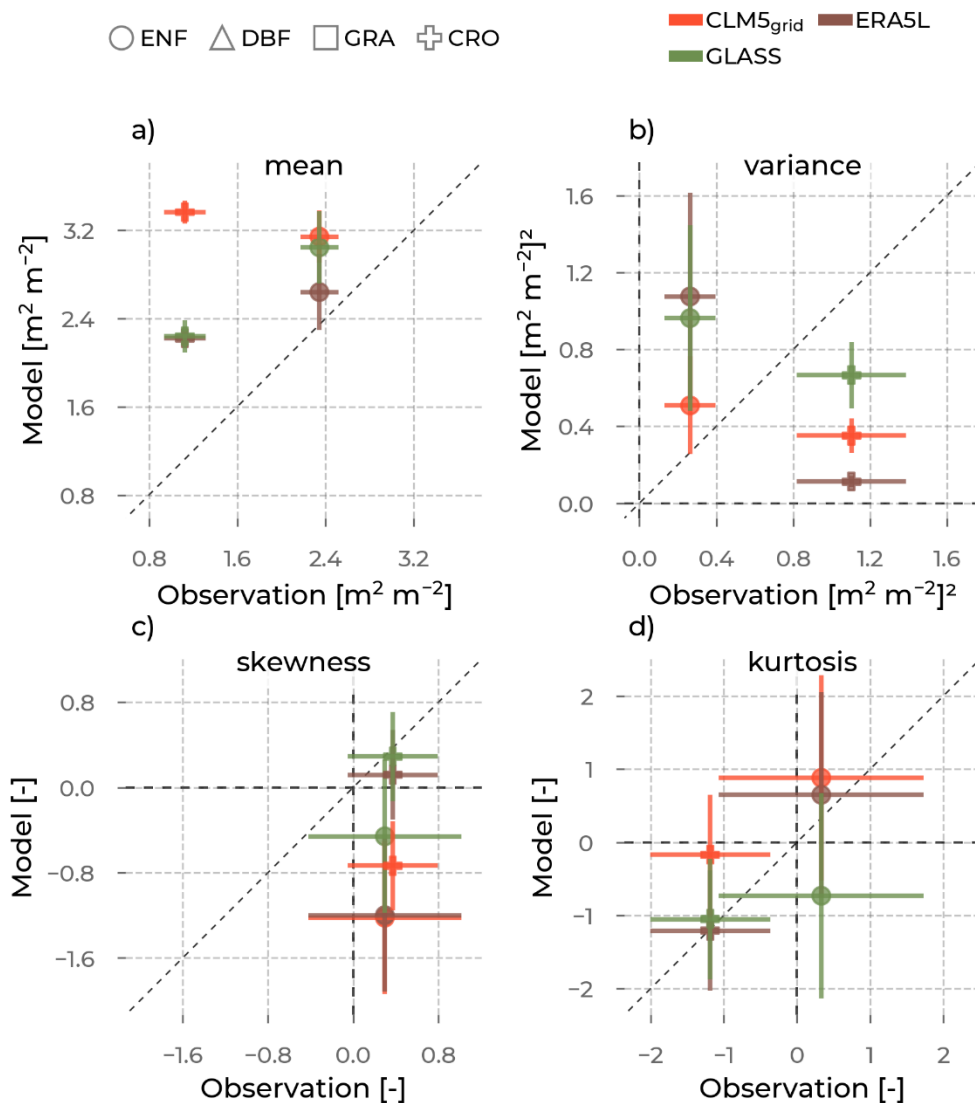

Figure S15: The mean (a), variance (b), skewness (c), and excess kurtosis (d) of the leaf area index (LAI) distributions from the models (color, y-axis), as opposed to the corresponding values from observations (x-axis) aggregated for each plant functional type (marker type): Evergreen Needleleaf Forest (ENF), Deciduous Broadleaf Forest (DBF), Grasslands (GRA), Croplands (CRO). The error bars are the standard errors of the respective moment, depending on the sample size.
